# Supplementary material for: Disturbed functional connectivity and topological properties of the frontal lobe in minimally conscious state based on resting-state fNIRS
Source: Front Neurosci. 2023 Feb 10;17:1118395. doi: 10.3389/fnins.2023.1118395 (PMC9950516; doi:10.3389/fnins.2023.1118395)
Supplement: Supplementary file 2 [file Data_Sheet_2.xlsx]

## Sheet: edge number
	Thresholds											mean value
	0.4	0.45	0.5	0.55	0.6	0.65	0.7	0.75	0.8	0.85	0.9
HC01	470	416	360	311	262	209	152	109	65	31	16	218.273
HC02	857	802	766	733	686	644	584	508	412	274	126	581.091
HC03	1059	1044	1027	989	940	867	782	683	552	370	167	770.909
HC04	569	490	419	365	296	242	181	116	67	28	8	252.818
HC05	597	529	441	361	282	217	153	101	61	28	8	252.545
HC06	984	940	885	829	759	674	592	482	342	204	71	614.727
HC07	484	411	352	288	242	190	140	98	62	25	12	209.455
HC08	554	497	446	396	344	279	225	170	134	93	54	290.182
HC09	558	471	402	335	284	219	164	112	61	22	7	239.545
HC10	640	568	493	420	338	262	183	123	56	29	6	283.455
HC11	517	433	358	307	245	181	128	89	46	30	14	213.455
HC12	885	849	798	750	690	637	574	478	374	280	162	588.818
HC13	382	307	251	197	155	121	89	72	47	31	8	150.909
HC14	284	219	163	117	84	52	40	18	10	5	0	90.1818
HC15	452	387	324	280	236	184	128	85	54	32	15	197.909
HC16	673	617	569	520	472	427	374	317	257	171	76	406.636
	Thresholds											mean value
	0.4	0.45	0.5	0.55	0.6	0.65	0.7	0.75	0.8	0.85	0.9
MCS01	297	219	166	114	80	54	31	21	13	9	3	91.5455
MCS02	231	176	130	102	69	45	27	15	8	2	1	73.2727
MCS03	553	497	440	391	332	274	219	166	101	58	19	277.273
MCS04	656	605	564	526	485	445	398	347	263	194	111	417.636
MCS05	743	685	610	542	481	410	336	248	178	100	43	397.818
MCS06	426	355	304	242	186	144	110	69	42	18	6	172.909
MCS07	472	401	354	299	253	203	171	141	97	59	20	224.545
MCS08	450	371	310	250	187	139	93	55	32	12	7	173.273
MCS09	446	382	321	268	208	166	123	88	60	37	18	192.455
MCS10	514	457	391	332	276	238	194	144	108	65	30	249.909
MCS11	367	311	246	197	149	105	70	44	27	11	4	139.182
MCS12	299	233	174	133	96	65	50	27	13	6	0	99.6364
MCS13	399	342	283	230	179	127	93	60	39	22	11	162.273
MCS14	418	349	293	233	177	135	97	66	30	11	3	164.727
MCS15	466	394	337	281	210	154	110	76	46	23	7	191.273

## Sheet: global
aSigma (σ）		aCp		aLp		aEg		aEloc
HC	MCS	HC	MCS	HC	MCS	HC	MCS	HC	MCS
1.2708		0.25754	0.12375	6.8506	22.85	0.15206	0.096264	0.29866	0.15246
0.53427		0.38492	0.083272	0.77128	88.4632	0.3494	0.049474	0.41599	0.096255
0.52169	0.55434	0.42485	0.26785	0.65523	2.2782	0.40654	0.19751	0.44968	0.30554
2.0301	0.45772	0.24623	0.36409	5.0753	1.0779	0.21072	0.27217	0.29649	0.39242
0.92987	0.52238	0.27941	0.34081	3.4504	1.1528	0.23392	0.28786	0.33303	0.3783
0.51069		0.38277	0.19014	0.78655	14.8437	0.36464	0.10874	0.41463	0.2212
0.69788	0.90946	0.24136	0.29833	3.8587	2.3159	0.17719	0.18086	0.27995	0.3427
0.6921		0.28244	0.19737	1.6768	13.496	0.21908	0.12961	0.32803	0.23872
0.77448	0.70048	0.24957	0.25455	4.6505	4.5505	0.19612	0.14254	0.29176	0.29081
	0.9107	0.27629	0.27986	4.4871	2.6489	0.21407	0.16139	0.32072	0.31898
1.1183	1.1547	0.24432	0.16221	4.0017	15.4754	0.19843	0.08547	0.29458	0.18658
0.49055		0.39851	0.15748	0.79738		0.34884	0.10685	0.4228	0.19228
0.85206	0.78606	0.2587	0.18348	5.6164	6.3518	0.13522	0.12295	0.2941	0.21751
	1.2457	0.1286	0.21038		13.8989	0.097314	0.14903	0.15889	0.2526
1.0284		0.25843	0.2213	4.497	6.3615	0.17116	0.1741	0.29851	0.26514
0.51945		0.35067		1.0832		0.27553		0.38415

## Sheet: NCp
L_FPA		R_DLPFC		R_FEF
HC	MCS	HC	MCS	HC	MCS
0.21323	0.081342	0.17743	0.11822	0.34297	0.057381
0.39269	0.12929	0.43694	0.10472	0.43059	0.1152
0.4381	0.21171	0.43815	0.23426	0.4276	0.17092
0.27309	0.36304	0.27219	0.3681	0.25959	0.40438
0.24139	0.36968	0.2752	0.39524	0.34323	0.37882
0.38719	0.23978	0.41149	0.16118	0.42239	0.21887
0.32645	0.30833	0.26072	0.31281	0.19232	0.2964
0.35381	0.17525	0.28193	0.19652	0.31556	0.19998
0.29599	0.22593	0.23114	0.22096	0.26726	0.29012
0.30936	0.26502	0.29834	0.17825	0.38897	0.30836
0.29546	0.21246	0.24887	0.19974	0.28626	0.10463
0.43078	0.154	0.4315	0.085913	0.30382	0.14609
0.28878	0.24619	0.24529	0.12236	0.28223	0.25922
0.15679	0.16395	0.10181	0.16116	0.13691	0.076118
0.31926	0.22824	0.19297	0.08943	0.29769	0.26424
0.42552		0.30214		0.41347

## Sheet: NLe
L_FPA		R_DLPFC
HC	MCS	HC	MCS
0.26957	0.10789	0.20885	0.14503
0.43166	0.15137	0.46791	0.10912
0.46233	0.24881	0.4638	0.26217
0.33453	0.40543	0.32923	0.39653
0.29036	0.41671	0.31856	0.43321
0.4109	0.27988	0.45022	0.17822
0.37692	0.35373	0.29049	0.3548
0.39064	0.21814	0.33171	0.2414
0.35296	0.26357	0.26692	0.24628
0.35586	0.31616	0.35133	0.20668
0.37247	0.23863	0.30488	0.22215
0.45838	0.18973	0.45781	0.11158
0.33143	0.29681	0.28221	0.13831
0.20974	0.2023	0.12439	0.20325
0.38667	0.27193	0.21524	0.10597
0.46192		0.33331
